# Supplementary material
Source: PubMed Central journal article supplement (PMC3059716)
Supplement: NIHMS248955-supplement-4.pdf [file NIHMS248955-supplement-4.pdf]

**a**

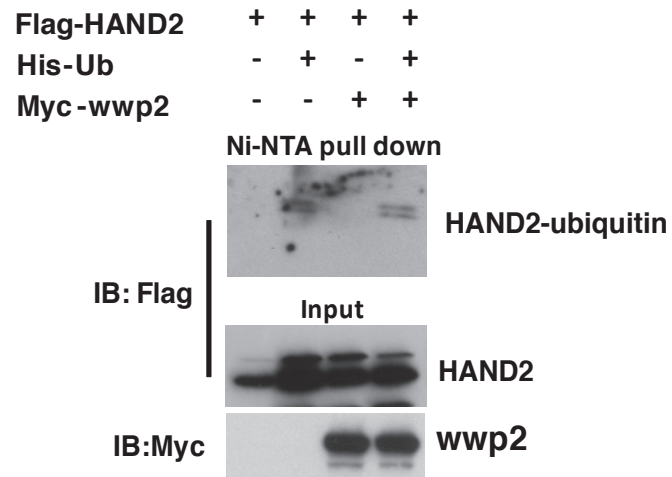

**b**

|                   |                       |             |                   |
|-------------------|-----------------------|-------------|-------------------|
| Homo_Sapien       | ....GAVPPLGAQQ CSCVPT | <b>PPGY</b> | EGPGSVLVSP VP.... |
| Mus_musculus      | ....GAVPPLGAQQ CSCVPT | <b>PPGY</b> | EGPGSVLVSP VP.... |
| Rattus_norvegicus | ....GAVPPLGAQQ CSCVPT | <b>PPGY</b> | EGPGSVLVSP VP.... |
| Bos_Taurus        | ....GAVPPLGAQQ CSCVPT | <b>PPGY</b> | EGPGSVLVSA VP.... |
