# Supplementary material
Source: PubMed Central journal article supplement (PMC3059716)

Figure 1C

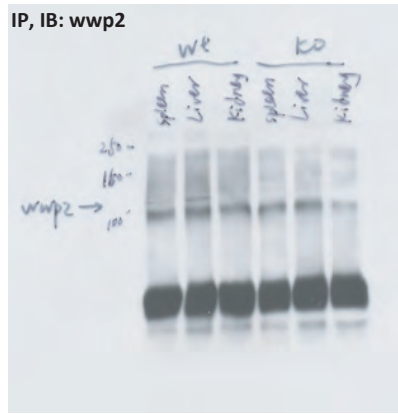

Figure 3a

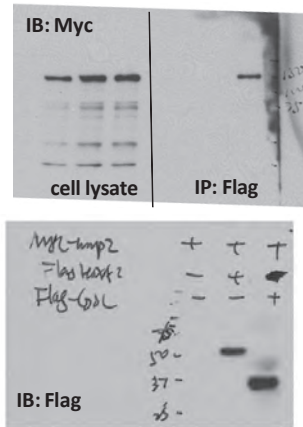

Figure 3b

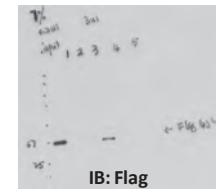

Figure 3c

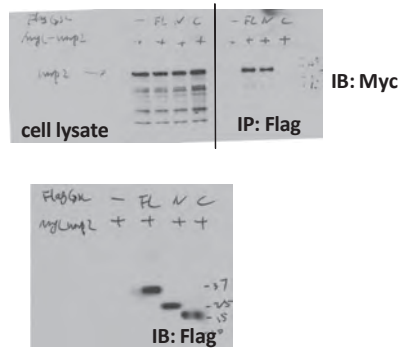

Figure 3d

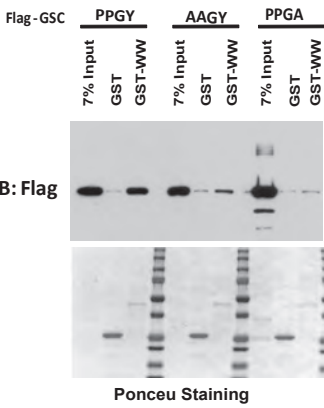

Figure 3f

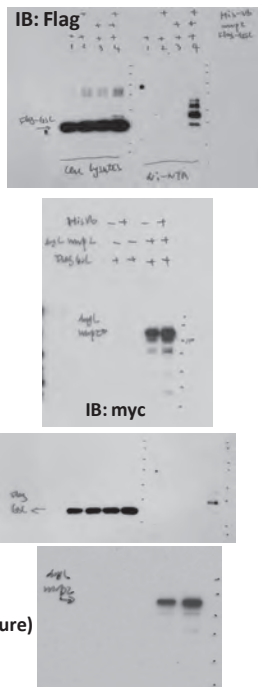

Figure 3g

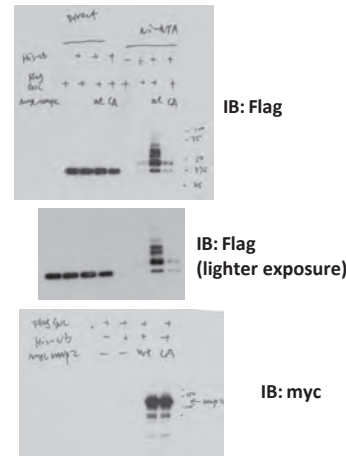

Figure 3h

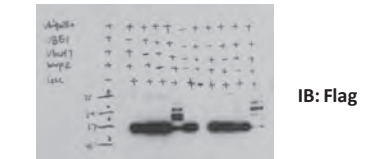

Figure 4a

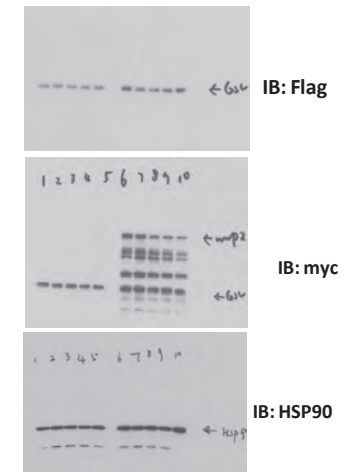

Figure 4b

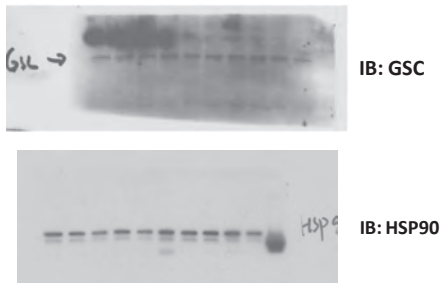

Figure 4d

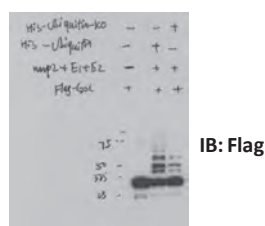

Figure 5f

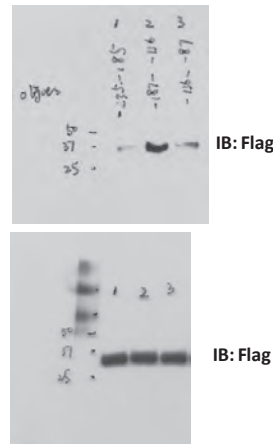

Figure 5C

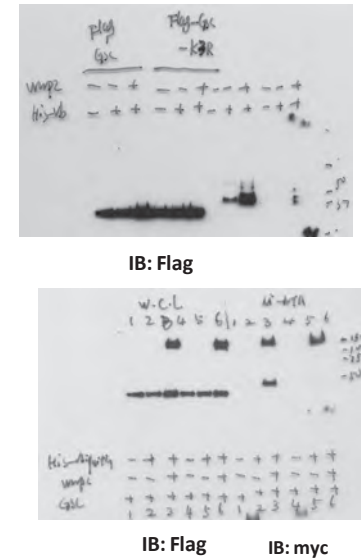

Figure 4C

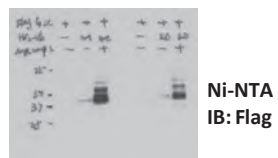

Supplement: NIHMS248955-supplement-8.pdf [file NIHMS248955-supplement-8.pdf]
