# Supplementary material
Source: PubMed Central journal article supplement (PMC3059716)

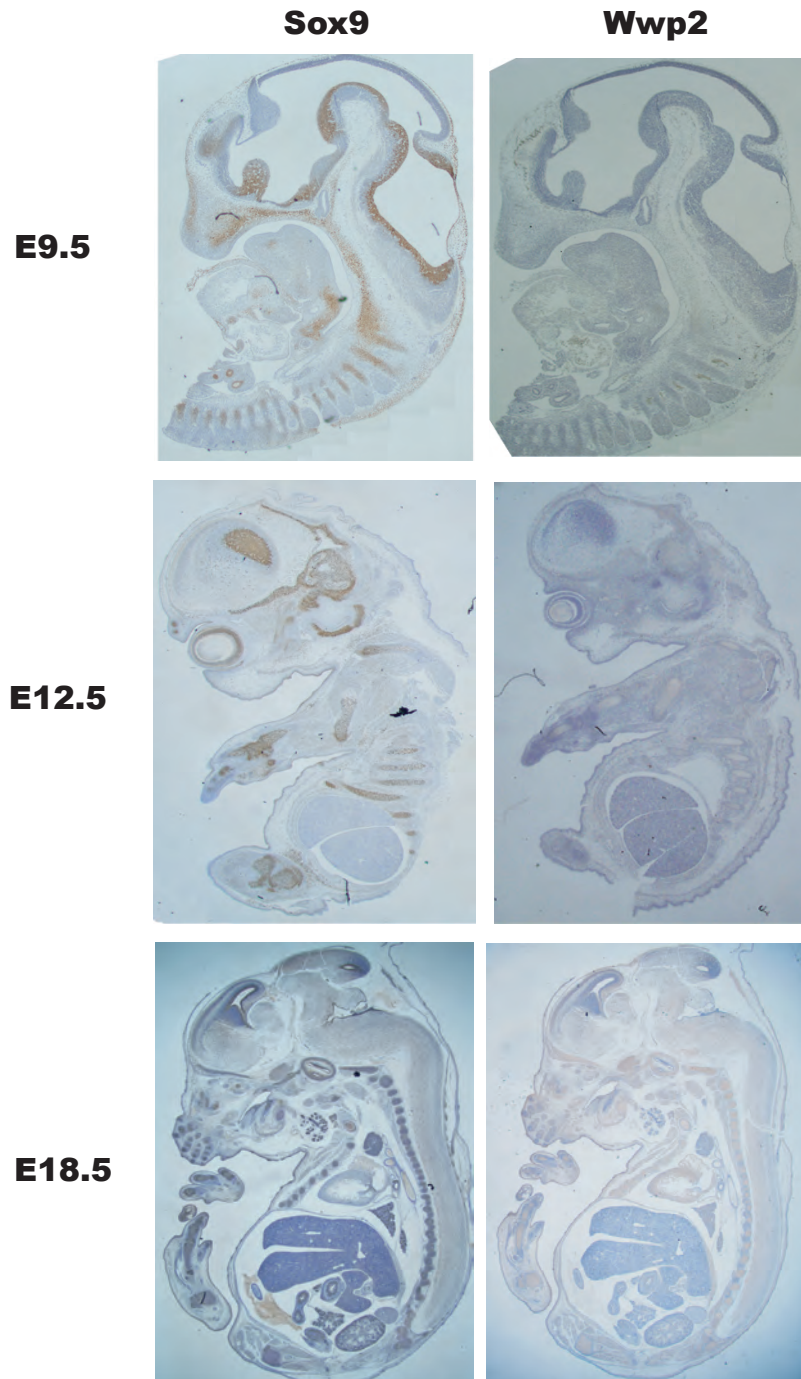

Supplement: NIHMS248955-supplement-2.pdf [file NIHMS248955-supplement-2.pdf]

Figure S2

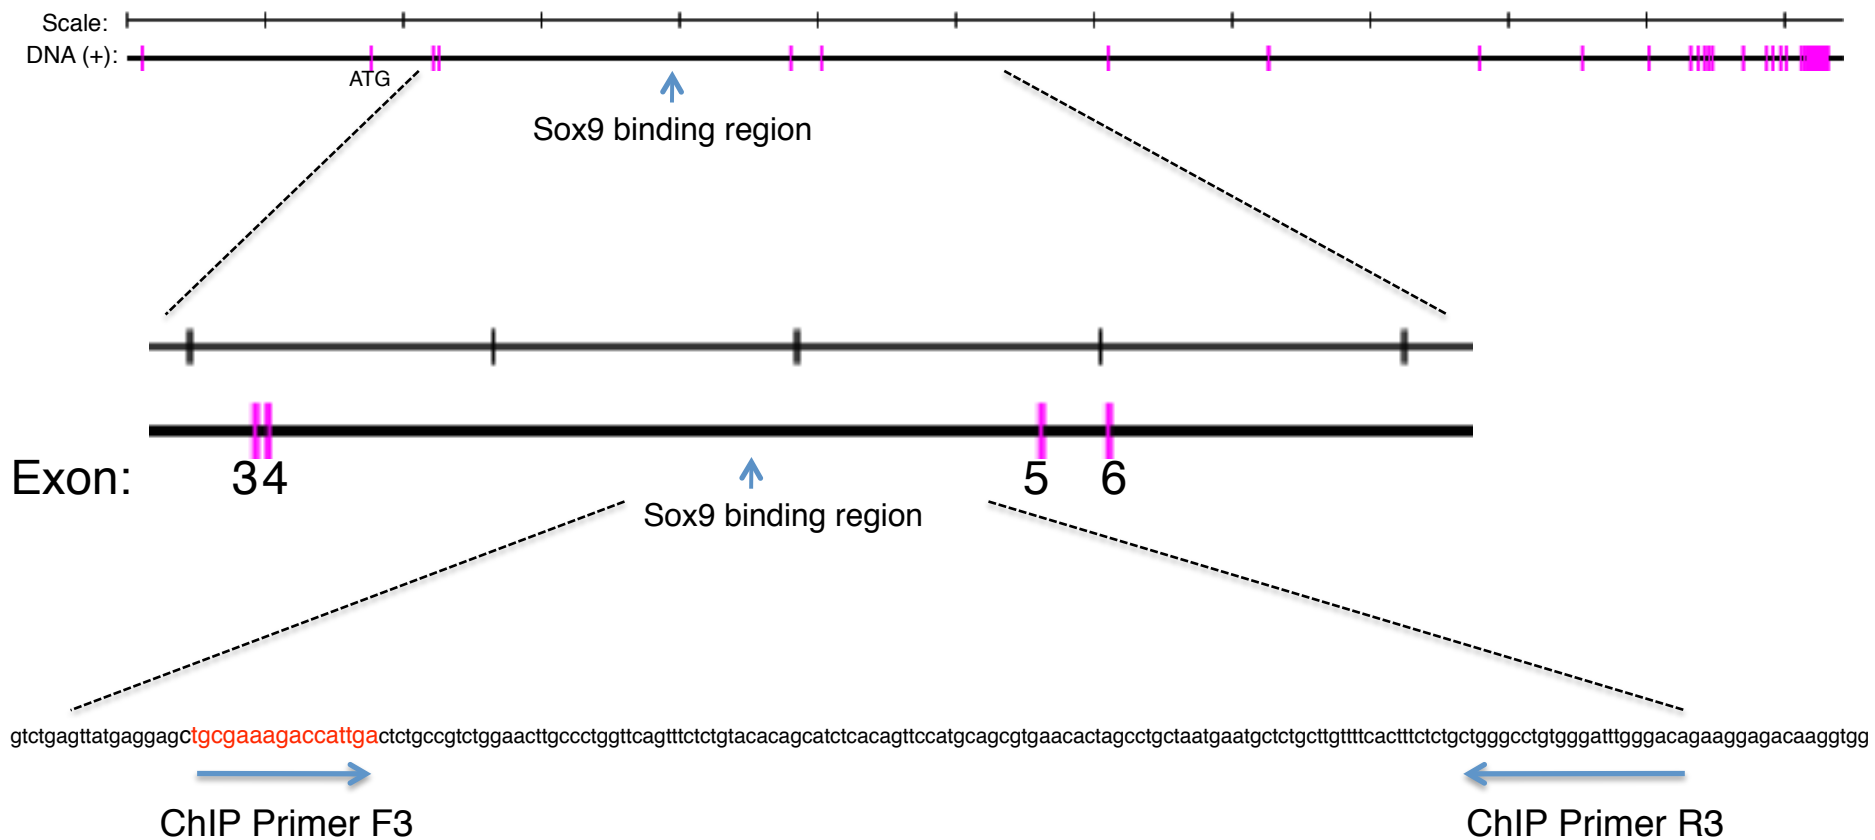

Supplement: NIHMS248955-supplement-3.pdf [file NIHMS248955-supplement-3.pdf]

**a**

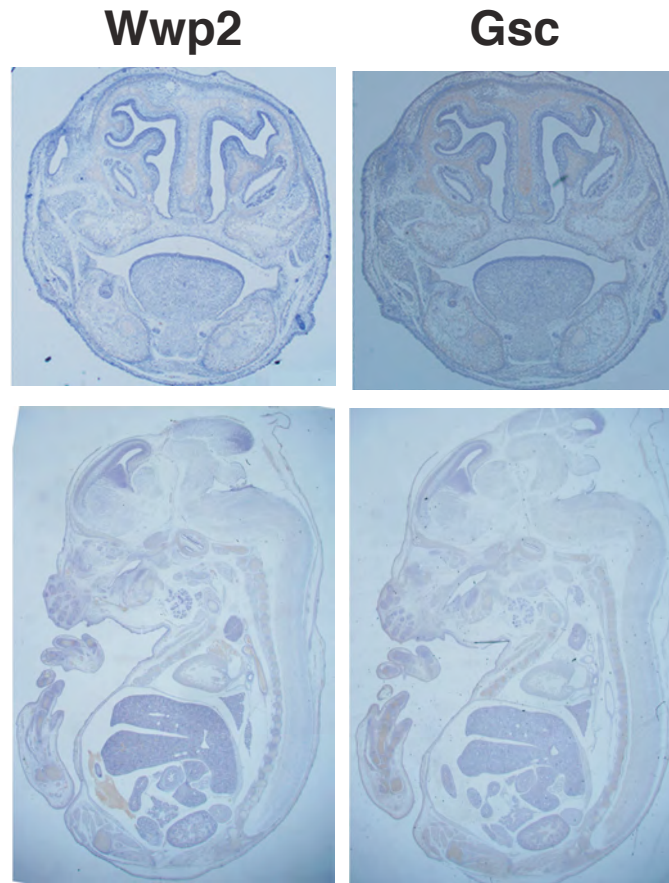

**b**

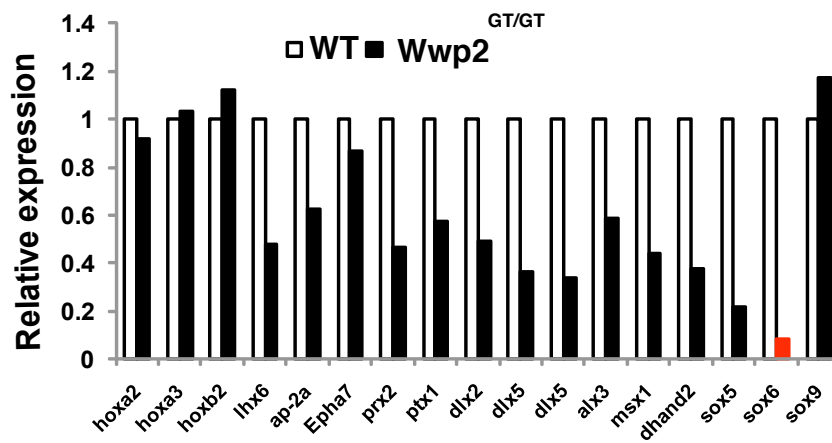

**c**

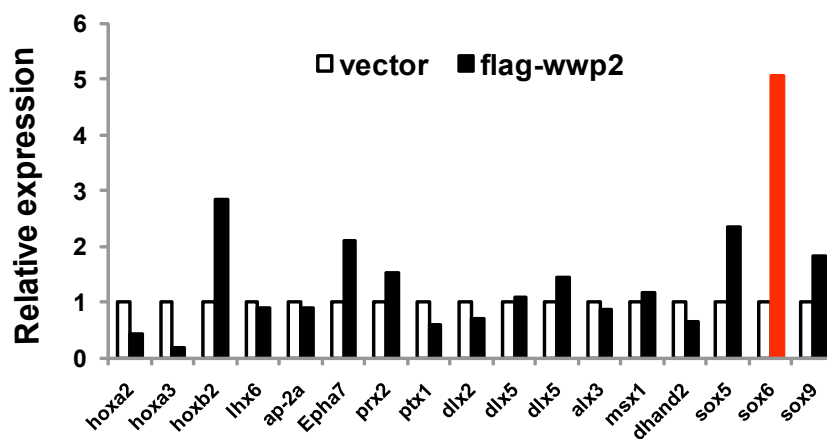

Supplement: NIHMS248955-supplement-5.pdf [file NIHMS248955-supplement-5.pdf]

A

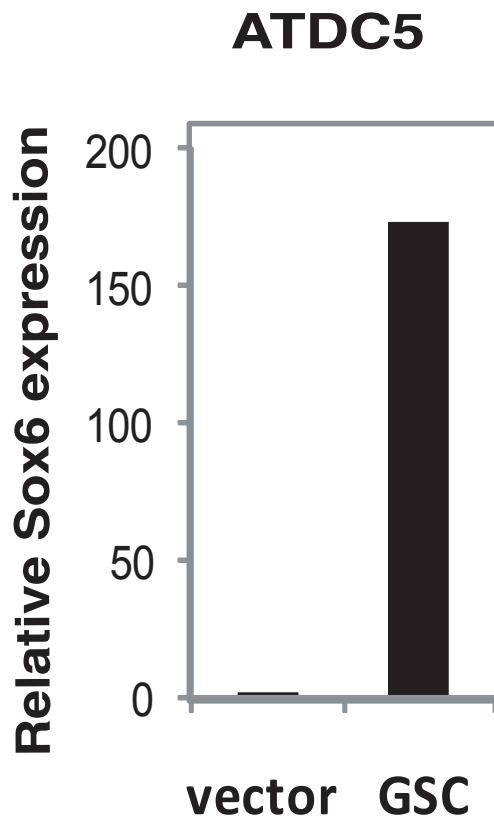

B

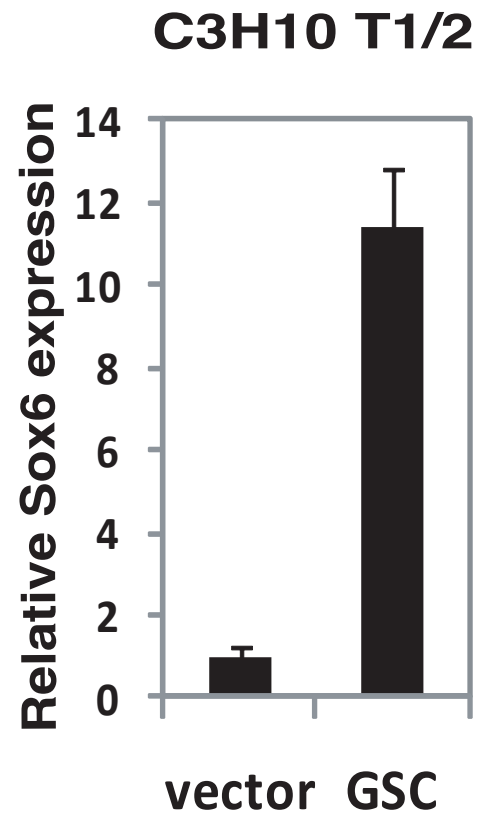

Supplement: NIHMS248955-supplement-6.pdf [file NIHMS248955-supplement-6.pdf]

**a**

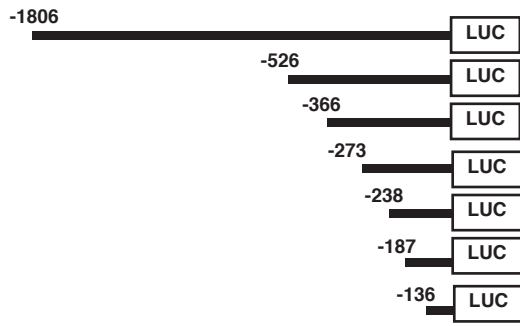

**b**

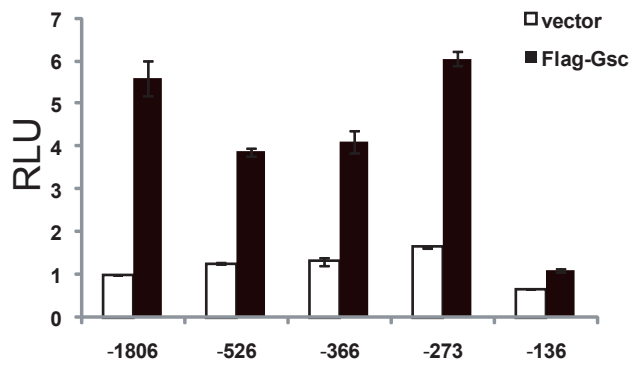

**c**

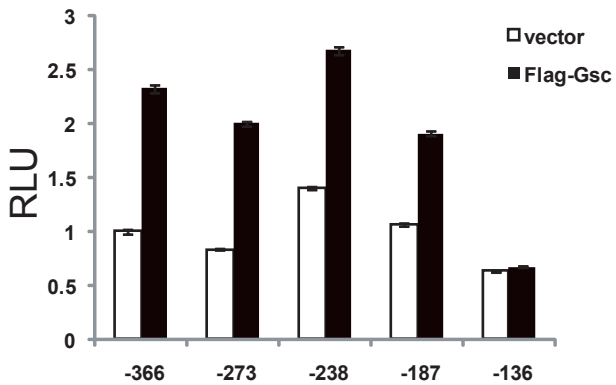

**d**

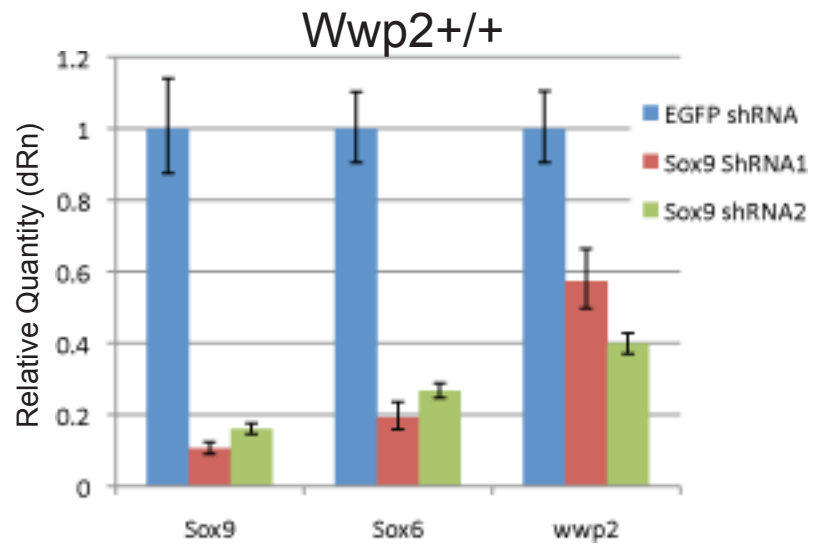

**e**

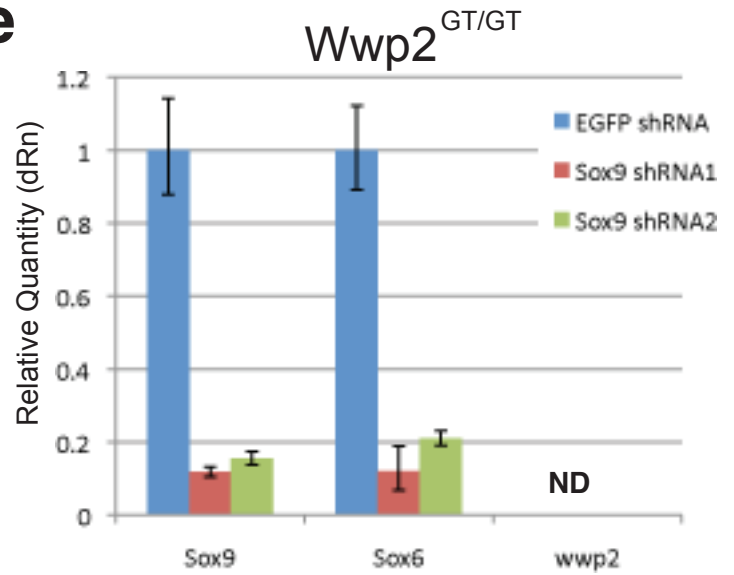

**f**

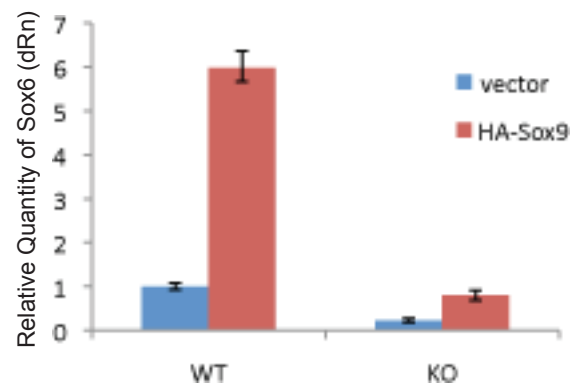

Supplement: NIHMS248955-supplement-7.pdf [file NIHMS248955-supplement-7.pdf]
